# Supplementary material
Source: PubMed Central journal article supplement (PMC3753952)
Supplement: AEM.00934-13_zam999104641so1.pdf [file AEM.00934-13_zam999104641so1.pdf]

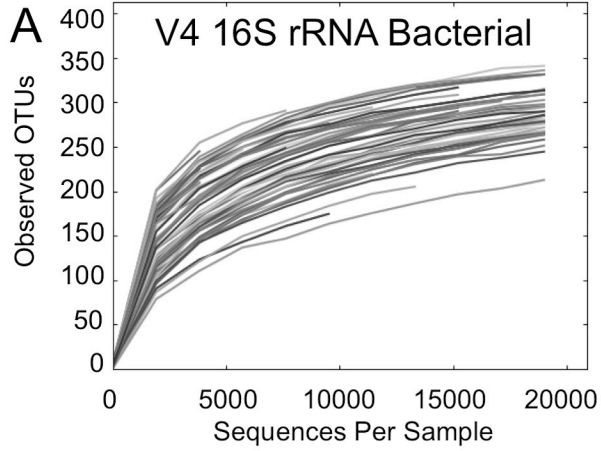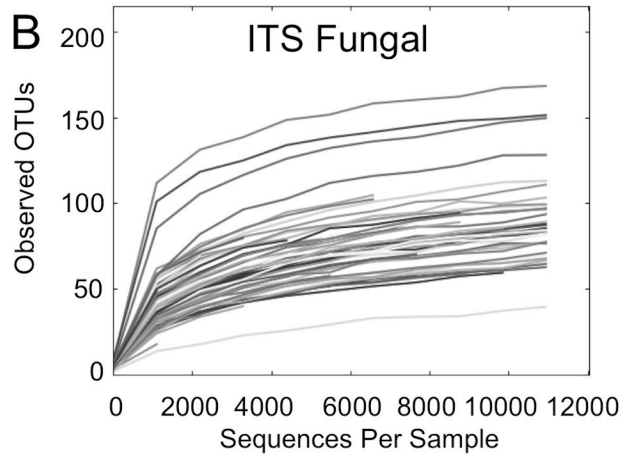

**Figure S1.** Observed OTU rarefaction curves for bacterial 16S rRNA (A) and fungal ITS1 (B) sequencing runs.
